# Supplementary material
Source: HighWire-hosted journal article supplement (https://bmjopen.bmj.com/content/14/4/e083080)
Supplement: inline-supplementary-material-1 [file inline-supplementary-material-1.pdf]

SUPPLEMENTARY TABLES

Supplementary Table 1. Country and survey characteristics across five countries of the ITC surveys

|                                                   | <b>BRAZIL</b><br>             | <b>JAPAN</b><br>                                                                                                                                                                                                                                                                                              | <b>REPUBLIC OF KOREA</b><br>                                                                                                                                                                                                                                                         | <b>MALAYSIA</b><br>                                                                                                                                                                                                                                           | <b>MEXICO</b><br>     |
|---------------------------------------------------|----------------------------------------------------------------------------------------------------------------|--------------------------------------------------------------------------------------------------------------------------------------------------------------------------------------------------------------------------------------------------------------------------------------------------------------------------------------------------------------------------------------------------|-------------------------------------------------------------------------------------------------------------------------------------------------------------------------------------------------------------------------------------------------------------------------------------------------------------------------------------------------------------------------|--------------------------------------------------------------------------------------------------------------------------------------------------------------------------------------------------------------------------------------------------------------------------------------------------------------------------------------------------|----------------------------------------------------------------------------------------------------------|
| <b>Country characteristics</b>                    |                                                                                                                |                                                                                                                                                                                                                                                                                                                                                                                                  |                                                                                                                                                                                                                                                                                                                                                                         |                                                                                                                                                                                                                                                                                                                                                  |                                                                                                          |
| Country income level <sup>a</sup>                 | Upper-middle                                                                                                   | High                                                                                                                                                                                                                                                                                                                                                                                             | High                                                                                                                                                                                                                                                                                                                                                                    | Upper-middle                                                                                                                                                                                                                                                                                                                                     | Upper-middle                                                                                             |
| Current cigarette smoking prevalence <sup>b</sup> | 11.2%                                                                                                          | 18.9%                                                                                                                                                                                                                                                                                                                                                                                            | 19.3%                                                                                                                                                                                                                                                                                                                                                                   | 17.9%                                                                                                                                                                                                                                                                                                                                            | 13.9%                                                                                                    |
| <b>Survey characteristics</b>                     |                                                                                                                |                                                                                                                                                                                                                                                                                                                                                                                                  |                                                                                                                                                                                                                                                                                                                                                                         |                                                                                                                                                                                                                                                                                                                                                  |                                                                                                          |
| Survey sampling frame                             | Adults (aged 18+) who smoke cigarettes and non-smokers, living in Sao Paulo, Rio de Janeiro and Porto Alegre.  | Adults (aged 20+) who smoke cigarettes, who use heated tobacco products, and non-users.                                                                                                                                                                                                                                                                                                          | Adults (aged 19+) who smoke cigarettes, use heated tobacco products, use electronic cigarettes, and non-users.                                                                                                                                                                                                                                                          | Adults (aged 18+) who smoke cigarettes and non-smokers.                                                                                                                                                                                                                                                                                          | Adults (aged 18+) who smoke cigarettes.                                                                  |
| Sampling design                                   | Households randomly called using systematic sampling from an electronic phone number directory.                | Rakuten Insight panel. Panelists pre-profiled with pre-targeted variables (e.g., smoking). Quotas based on the region of residence, sex, and age, were applied to ensure the final sample sizes were proportional to stratum sizes based on the Japan Society and New Tobacco Internet Survey (JASTIS). Methods are used to maintain panel to be consistent as possible with general population. | Rakuten Insight panel. Panelists pre-profiled with pre-targeted variables (e.g., smoking). Quotas based on sex and age groups, applied to target final sample sizes proportional to stratum sizes based on smoking prevalence estimates in combination with Korea census data. Methods are used to maintain panel to be consistent as possible with general population. | Rakuten Insight panel. Panelists pre-profiled with pre-targeted variables (e.g., smoking). Quotas based on region of residence, sex, and age, were applied to ensure the final sample was proportional to stratum sizes based on Malaysian census data. Methods are used to maintain panel to be consistent as possible with general population. | Online market research consumer panel. Quotas based on age, sex, education groups, and people who vape.. |
| Analytic sample                                   | Adults (aged 18+) who smoke cigarettes at least monthly AND smoked 100+ cigarettes in their lifetime (N=1215). | Adults (aged 20+) who smoke cigarettes at least monthly AND smoked 100+ cigarettes in their lifetime (N=2876).                                                                                                                                                                                                                                                                                   | Adults (aged 19+) who smoke cigarettes at least monthly AND smoked 100+ cigarettes in their lifetime (N=3765).                                                                                                                                                                                                                                                          | Adults (aged 18+) who smoke cigarettes at least monthly AND smoked 100+ cigarettes in their lifetime (N=1104).                                                                                                                                                                                                                                   | Adults (aged 18+) who smoked cigarettes in the last 30 days (N=1104).                                    |
| Sample type                                       | Recontact and replenishment                                                                                    | Recontact and replenishment                                                                                                                                                                                                                                                                                                                                                                      | Recontact and replenishment                                                                                                                                                                                                                                                                                                                                             | Newly sampled                                                                                                                                                                                                                                                                                                                                    | Recontact and replenishment                                                                              |
| Dates of data collection                          | September 2016 to March 2017                                                                                   | July 2021 to August 2021                                                                                                                                                                                                                                                                                                                                                                         | November 2021 to December 2021                                                                                                                                                                                                                                                                                                                                          | February 2020 to March 2020                                                                                                                                                                                                                                                                                                                      | March 2021 to April 2021                                                                                 |
| Survey wave                                       | 3                                                                                                              | 4                                                                                                                                                                                                                                                                                                                                                                                                | 2                                                                                                                                                                                                                                                                                                                                                                       | 1                                                                                                                                                                                                                                                                                                                                                | 8                                                                                                        |
| Survey mode                                       | Telephone                                                                                                      | Web                                                                                                                                                                                                                                                                                                                                                                                              | Web                                                                                                                                                                                                                                                                                                                                                                     | Web                                                                                                                                                                                                                                                                                                                                              | Web                                                                                                      |
| Response rate (%) <sup>c</sup>                    | 35.5                                                                                                           | 27.4                                                                                                                                                                                                                                                                                                                                                                                             | 16.4                                                                                                                                                                                                                                                                                                                                                                    | 11.3                                                                                                                                                                                                                                                                                                                                             | --                                                                                                       |
| Cooperation rate (%)                              | 60.4                                                                                                           | 94.5                                                                                                                                                                                                                                                                                                                                                                                             | 97.0                                                                                                                                                                                                                                                                                                                                                                    | 95.3                                                                                                                                                                                                                                                                                                                                             | --                                                                                                       |

<sup>a</sup> 2021 World Bank

<sup>b</sup> 2021 WHO age-standardized estimated prevalence of smoking among those aged 15 years or more; WHO report on the global tobacco epidemic, 2023: protect people from tobacco smoke. Geneva: World Health Organization; 2023.

<sup>c</sup> The denominator of the response rates for the web panel surveys (all countries except Brazil) is all potential respondents who were sent invitations to the surveys. It should be noted that many panel members are no longer active. For the telephone survey in Brazil, the denominator of the response rate is all potential respondents who were phoned. Those who did not answer after seven tries were considered a non-response. Post-stratification weights adjust for non-response bias.

Supplementary Table 2. Overall sample characteristics of adults who smoke cigarettes across five countries of the ITC Surveys, weighted (full table)

|                           | BRAZIL<br><i>Wave 3, 2016/2017</i><br>(N=1215)<br> |      |              | JAPAN<br><i>Wave 4, 2021</i><br>(N=2876)<br> |      |              | REPUBLIC OF KOREA<br><i>Wave 2, 2021</i><br>(N=3765)<br> |      |              | MALAYSIA<br><i>Wave 1, 2020</i><br>(N=1104)<br> |      |              | MEXICO<br><i>Wave 8, 2021</i><br>(N=1331)<br> |      |              |
|---------------------------|-------------------------------------------------------------------------------------------------------------------------------------|------|--------------|---------------------------------------------------------------------------------------------------------------------------------|------|--------------|---------------------------------------------------------------------------------------------------------------------------------------------|------|--------------|------------------------------------------------------------------------------------------------------------------------------------|------|--------------|----------------------------------------------------------------------------------------------------------------------------------|------|--------------|
|                           | n                                                                                                                                   | %    | 95%CI        | n                                                                                                                               | %    | 95%CI        | n                                                                                                                                           | %    | 95%CI        | n                                                                                                                                  | %    | 95%CI        | n                                                                                                                                | %    | 95%CI        |
| Sex                       |                                                                                                                                     |      |              |                                                                                                                                 |      |              |                                                                                                                                             |      |              |                                                                                                                                    |      |              |                                                                                                                                  |      |              |
| Male                      | 602                                                                                                                                 | 47.9 | (43.7, 42.2) | 2090                                                                                                                            | 67.5 | (63.0, 71.8) | 3250                                                                                                                                        | 89.9 | (85.8, 92.9) | 995                                                                                                                                | 97.3 | (96.5, 97.9) | 645                                                                                                                              | 60.1 | (53.3, 66.5) |
| Female                    | 614                                                                                                                                 | 52.1 | (47.8, 56.3) | 786                                                                                                                             | 32.4 | (28.2, 37.0) | 515                                                                                                                                         | 10.1 | (7.1, 14.2)  | 105                                                                                                                                | 2.7  | (2.1, 3.5)   | 686                                                                                                                              | 39.9 | (33.5, 46.7) |
| Age group (years)         |                                                                                                                                     |      |              |                                                                                                                                 |      |              |                                                                                                                                             |      |              |                                                                                                                                    |      |              |                                                                                                                                  |      |              |
| 18-24 <sup>a</sup>        | 26                                                                                                                                  | 4.4  | (2.8, 7.1)   | 14                                                                                                                              | 2.7  | (0.8, 8.5)   | 125                                                                                                                                         | 8.8  | (4.5, 16.5)  | 160                                                                                                                                | 13.7 | (11.4, 16.4) | 134                                                                                                                              | 9.6  | (6.7, 13.5)  |
| 25-39                     | 205                                                                                                                                 | 34.6 | (30.2, 39.2) | 758                                                                                                                             | 31.9 | (27.4, 36.8) | 1213                                                                                                                                        | 26.2 | (22.6, 30.2) | 670                                                                                                                                | 51.0 | (47.1, 54.9) | 575                                                                                                                              | 56.1 | (49.2, 62.7) |
| 40-54                     | 334                                                                                                                                 | 34.6 | (30.8, 38.6) | 988                                                                                                                             | 31.7 | (28.2, 35.3) | 1698                                                                                                                                        | 37.4 | (32.7, 42.4) | 228                                                                                                                                | 29.7 | (26.0, 33.8) | 437                                                                                                                              | 25.9 | (20.6, 32.0) |
| 55+                       | 651                                                                                                                                 | 26.3 | (23.4, 29.5) | 1116                                                                                                                            | 33.8 | (30.0, 37.7) | 729                                                                                                                                         | 27.6 | (22.2, 33.7) | 46                                                                                                                                 | 5.5  | (3.9, 7.8)   | 185                                                                                                                              | 8.4  | (6.2, 11.3)  |
| Education                 |                                                                                                                                     |      |              |                                                                                                                                 |      |              |                                                                                                                                             |      |              |                                                                                                                                    |      |              |                                                                                                                                  |      |              |
| Low                       | 357                                                                                                                                 | 29.5 | (25.8, 33.4) | 78                                                                                                                              | 2.2  | (1.7, 2.8)   | 29                                                                                                                                          | 1.9  | (1.2, 3.1)   | 366                                                                                                                                | 47.6 | (43.7, 51.5) | 116                                                                                                                              | 47.6 | (40.3, 54.9) |
| Moderate                  | 435                                                                                                                                 | 37.5 | (33.4, 41.8) | 1448                                                                                                                            | 52.5 | (48.0, 56.9) | 699                                                                                                                                         | 58.6 | (53.6, 63.5) | 314                                                                                                                                | 36.5 | (32.8, 40.3) | 763                                                                                                                              | 36.7 | (31.2, 42.6) |
| High                      | 406                                                                                                                                 | 31.9 | (28.0, 36.1) | 1312                                                                                                                            | 45.3 | (40.9, 49.8) | 3022                                                                                                                                        | 39.4 | (34.7, 44.4) | 412                                                                                                                                | 15.9 | (14.0, 18.0) | 452                                                                                                                              | 15.7 | (12.7, 19.2) |
| Smoking frequency         |                                                                                                                                     |      |              |                                                                                                                                 |      |              |                                                                                                                                             |      |              |                                                                                                                                    |      |              |                                                                                                                                  |      |              |
| Daily                     | 18                                                                                                                                  | 1.1  | (0.6, 2.1)   | 2426                                                                                                                            | 69.1 | (62.9, 74.7) | 3240                                                                                                                                        | 69.6 | (61.8, 76.4) | 937                                                                                                                                | 88.5 | (86.0, 90.5) | 651                                                                                                                              | 47.1 | (40.0, 54.3) |
| Non-daily                 | 1,135                                                                                                                               | 92.8 | (90.2, 94.8) | 450                                                                                                                             | 30.9 | (25.3, 37.1) | 525                                                                                                                                         | 30.4 | (23.6, 38.2) | 167                                                                                                                                | 11.5 | (9.4, 14.0)  | 660                                                                                                                              | 52.9 | (45.7, 60.0) |
| Plans to quit             |                                                                                                                                     |      |              |                                                                                                                                 |      |              |                                                                                                                                             |      |              |                                                                                                                                    |      |              |                                                                                                                                  |      |              |
| No plans                  | 81                                                                                                                                  | 7.2  | (5.2, 9.8)   | 1284                                                                                                                            | 46.1 | (41.3, 50.9) | 1028                                                                                                                                        | 30.0 | (25.5, 35.0) | 153                                                                                                                                | 14.8 | (12.1, 17.9) | 294                                                                                                                              | 23.8 | (18.0, 30.9) |
| Within the next 6 months  | 574                                                                                                                                 | 52.9 | (48.4, 57.3) | 235                                                                                                                             | 19.4 | (14.3, 25.7) | 1042                                                                                                                                        | 40.3 | (33.9, 47.0) | 460                                                                                                                                | 42.0 | (38.2, 46.0) | 460                                                                                                                              | 38.7 | (31.5, 46.5) |
| In future beyond 6 months | 316                                                                                                                                 | 23.9 | (20.5, 27.7) | 924                                                                                                                             | 34.5 | (30.4, 38.9) | 1313                                                                                                                                        | 29.7 | (24.5, 35.4) | 424                                                                                                                                | 43.2 | (39.2, 47.2) | 485                                                                                                                              | 37.4 | (30.6, 44.8) |

<sup>a</sup> Age group is 20-24 years for Japan and 19-24 years for Republic of Korea, based on the respective countries’ definitions of the start of adulthood.

Supplementary Table 3. Prevalence of usual/preferred brand has a flavour capsule overall and by sociodemographic characteristics and smoking behaviours among adults who smoke cigarettes across five countries of the ITC Surveys, weighted (full table)

|                                | BRAZIL<br><i>Wave 3, 2016/2017</i><br>(N=1215)  |      |                          | JAPAN<br><i>Wave 4, 2021</i><br>(N=2876)  |      |                           | REPUBLIC OF KOREA<br><i>Wave 2, 2021</i><br>(N=3765)  |      |                          | MALAYSIA<br><i>Wave 1, 2020</i><br>(N=1104)  |      |                          | MEXICO<br><i>Wave 8, 2021</i><br>(N=1331)  |      |              |
|--------------------------------|----------------------------------------------------------------------------------------------------------------------------------|------|--------------------------|------------------------------------------------------------------------------------------------------------------------------|------|---------------------------|------------------------------------------------------------------------------------------------------------------------------------------|------|--------------------------|---------------------------------------------------------------------------------------------------------------------------------|------|--------------------------|-------------------------------------------------------------------------------------------------------------------------------|------|--------------|
|                                | n                                                                                                                                | %    | 95%CI                    | n                                                                                                                            | %    | 95%CI                     | n                                                                                                                                        | %    | 95%CI                    | n                                                                                                                               | %    | 95%CI                    | n                                                                                                                             | %    | 95%CI        |
| Overall                        | 74                                                                                                                               | 6.7  | (4.7, 9.5)               | 485                                                                                                                          | 21.6 | (17.4, 26.4)              | 1216                                                                                                                                     | 31.8 | (26.4, 37.8)             | 332                                                                                                                             | 26.5 | (23.3, 30.0)             | 751                                                                                                                           | 50.3 | (43.1, 57.4) |
| Sex                            |                                                                                                                                  |      |                          |                                                                                                                              |      |                           |                                                                                                                                          |      |                          |                                                                                                                                 |      |                          |                                                                                                                               |      |              |
| Male                           | 39                                                                                                                               | 6.1  | (4.0, 9.2)               | 313                                                                                                                          | 20.1 | (15.0, 26.4)              | 1022                                                                                                                                     | 31.3 | (25.4, 37.7)             | 294                                                                                                                             | 26.3 | (23.0, 30.0)             | 304                                                                                                                           | 39.1 | (30.0, 49.0) |
| Female                         | 35                                                                                                                               | 7.3  | (4.1, 12.6)              | 172                                                                                                                          | 24.5 | (18.0, 32.5)              | 194                                                                                                                                      | 38.0 | (26.8, 50.8)             | 38                                                                                                                              | 32.3 | (21.6, 45.1)             | 447                                                                                                                           | 67.2 | (58.0, 75.2) |
| Age group (years) <sup>a</sup> |                                                                                                                                  |      |                          |                                                                                                                              |      |                           |                                                                                                                                          |      |                          |                                                                                                                                 |      |                          |                                                                                                                               |      |              |
| 18-24                          | 2                                                                                                                                | 12.0 | (2.0, 47.4) <sup>‡</sup> | 3                                                                                                                            | 80.4 | (44.3, 95.5) <sup>‡</sup> | 75                                                                                                                                       | 61.3 | (26.4, 87.4)             | 45                                                                                                                              | 23.7 | (16.7, 32.6)             | 94                                                                                                                            | 70.1 | (52.2, 83.4) |
| 25-39                          | 21                                                                                                                               | 8.5  | (4.7, 14.9)              | 167                                                                                                                          | 26.2 | (18.5, 35.7)              | 522                                                                                                                                      | 43.1 | (36.5, 49.9)             | 222                                                                                                                             | 30.3 | (26.0, 35.0)             | 376                                                                                                                           | 54.7 | (43.4, 65.5) |
| 40-54                          | 20                                                                                                                               | 4.6  | (2.5, 8.4) <sup>‡</sup>  | 172                                                                                                                          | 19.7 | (14.7, 25.9)              | 515                                                                                                                                      | 28.9 | (23.0, 35.7)             | 60                                                                                                                              | 25.0 | (18.6, 32.8)             | 216                                                                                                                           | 39.6 | (29.1, 51.2) |
| 55+                            | 31                                                                                                                               | 6.2  | (3.5, 10.8)              | 143                                                                                                                          | 13.8 | (10.4, 18.1)              | 104                                                                                                                                      | 14.3 | (6.0, 30.3) <sup>‡</sup> | 5                                                                                                                               | 7.6  | (2.3, 22.3) <sup>‡</sup> | 65                                                                                                                            | 30.4 | (18.7, 45.3) |
| Education                      |                                                                                                                                  |      |                          |                                                                                                                              |      |                           |                                                                                                                                          |      |                          |                                                                                                                                 |      |                          |                                                                                                                               |      |              |
| Low                            | 18                                                                                                                               | 4.4  | (2.3, 8.3) <sup>‡</sup>  | 6                                                                                                                            | 6.6  | (2.2, 18.1) <sup>‡</sup>  | 8                                                                                                                                        | 22.1 | (8.6, 45.9) <sup>‡</sup> | 103                                                                                                                             | 26.2 | (21.3, 31.9)             | 62                                                                                                                            | 43.7 | (30.9, 57.4) |
| Moderate                       | 24                                                                                                                               | 6.7  | (3.5, 12.5) <sup>‡</sup> | 253                                                                                                                          | 18.9 | (14.8, 23.8)              | 215                                                                                                                                      | 29.1 | (20.7, 39.1)             | 79                                                                                                                              | 24.0 | (18.7, 30.1)             | 402                                                                                                                           | 54.8 | (48.5, 61.0) |
| High                           | 32                                                                                                                               | 9.0  | (5.3, 14.9)              | 220                                                                                                                          | 24.8 | (17.7, 33.7)              | 990                                                                                                                                      | 36.5 | (31.4, 41.9)             | 147                                                                                                                             | 31.6 | (26.4, 37.3)             | 282                                                                                                                           | 59.8 | (50.5, 68.6) |
| Refused/don't know*            | 0                                                                                                                                | --   | --                       | 6                                                                                                                            | --   | --                        | 3                                                                                                                                        | --   | --                       | 3                                                                                                                               | --   | --                       | 0                                                                                                                             | --   | --           |
| Smoking frequency              |                                                                                                                                  |      |                          |                                                                                                                              |      |                           |                                                                                                                                          |      |                          |                                                                                                                                 |      |                          |                                                                                                                               |      |              |
| Daily                          | 66                                                                                                                               | 13.8 | (4.9, 33.4)              | 373                                                                                                                          | 17.4 | (15.7, 19.1)              | 1003                                                                                                                                     | 26.5 | (23.9, 29.3)             | 278                                                                                                                             | 26.3 | (22.8, 30.1)             | 348                                                                                                                           | 52.9 | (42.8, 62.8) |
| Non-daily                      | 8                                                                                                                                | 6.1  | (4.2, 8.9) <sup>‡</sup>  | 112                                                                                                                          | 31.5 | (19.4, 46.7)              | 213                                                                                                                                      | 44.5 | (28.2, 62.0)             | 54                                                                                                                              | 28.0 | (19.7, 38.0)             | 403                                                                                                                           | 47.2 | (37.2, 57.6) |
| Refused/ don't know*           | 0                                                                                                                                | --   | --                       | 0                                                                                                                            | --   | --                        | 0                                                                                                                                        | --   | --                       | 0                                                                                                                               | --   | --                       | 0                                                                                                                             | --   | --           |
| Plans to quit                  |                                                                                                                                  |      |                          |                                                                                                                              |      |                           |                                                                                                                                          |      |                          |                                                                                                                                 |      |                          |                                                                                                                               |      |              |
| No plans                       | 19                                                                                                                               | 5.4  | (2.9, 9.9) <sup>‡</sup>  | 184                                                                                                                          | 17.8 | (11.7, 26.1)              | 305                                                                                                                                      | 28.5 | (19.9, 38.9)             | 43                                                                                                                              | 27.4 | (18.9, 38.1)             | 177                                                                                                                           | 53.6 | (37.8, 68.8) |
| Within the next 6 months       | 33                                                                                                                               | 6.5  | (3.7, 11.1)              | 60                                                                                                                           | 27.7 | (15.0, 45.5)              | 385                                                                                                                                      | 38.0 | (26.6, 50.9)             | 157                                                                                                                             | 30.1 | (24.9, 35.9)             | 256                                                                                                                           | 52.5 | (39.8, 64.9) |
| In future beyond 6 months      | 19                                                                                                                               | 8.4  | (4.0, 16.6) <sup>‡</sup> | 177                                                                                                                          | 23.6 | (18.0, 30.4)              | 442                                                                                                                                      | 30.8 | (24.1, 38.4)             | 116                                                                                                                             | 23.7 | (18.9, 29.3)             | 285                                                                                                                           | 47.2 | (36.3, 58.4) |
| Refused/don't know*            | 3                                                                                                                                | --   | --                       | 64                                                                                                                           | --   | --                        | 84                                                                                                                                       | --   | --                       | 16                                                                                                                              | --   | --                       | 33                                                                                                                            | --   | --           |

<sup>a</sup> Age group is 20-24 years for Japan and 19-24 years for Republic of Korea, based on the respective countries' definitions of the start of adulthood.

<sup>‡</sup> Indicates high sampling variability; relative standard error > 0.3; interpret with caution

\*Refused/don't know responses set to missing

Supplementary Table 4. Correlates of usual cigarette brand smoke has a flavour capsule among adults who smoke across five countries of the ITC Surveys, weighted, logistic regression analyses (full table)

|                                | BRAZIL<br><i>Wave 3, 2016/2017</i><br>(N=1215)<br> |              |              | JAPAN<br><i>Wave 4, 2021</i><br>(N=2876)<br> |               |              | REPUBLIC OF KOREA<br><i>Wave 2, 2021</i><br>(N=3765)<br> |               |              | MALAYSIA<br><i>Wave 1, 2020</i><br>(N=1104)<br> |               |              | MEXICO<br><i>Wave 8, 2021</i><br>(N=1331)<br> |              |              |
|--------------------------------|-------------------------------------------------------------------------------------------------------------------------------------|--------------|--------------|---------------------------------------------------------------------------------------------------------------------------------|---------------|--------------|---------------------------------------------------------------------------------------------------------------------------------------------|---------------|--------------|------------------------------------------------------------------------------------------------------------------------------------|---------------|--------------|----------------------------------------------------------------------------------------------------------------------------------|--------------|--------------|
|                                | aOR†                                                                                                                                | 95% CI       | p-value      | aOR†                                                                                                                            | 95% CI        | p-value      | aOR†                                                                                                                                        | 95% CI        | p-value      | aOR†                                                                                                                               | 95% CI        | p-value      | aOR†                                                                                                                             | 95% CI       | p-value      |
| Sex                            |                                                                                                                                     |              |              |                                                                                                                                 |               |              |                                                                                                                                             |               |              |                                                                                                                                    |               |              |                                                                                                                                  |              |              |
| Male                           | 1.00                                                                                                                                |              |              | 1.00                                                                                                                            |               |              | 1.00                                                                                                                                        |               |              | 1.00                                                                                                                               |               |              | 1.00                                                                                                                             |              |              |
| Female                         | 1.41                                                                                                                                | (0.69, 2.86) | 0.341        | 1.79                                                                                                                            | (1.35, 2.38)  | <0.001       | 1.03                                                                                                                                        | (0.61, 1.75)  | 0.901        | 1.39                                                                                                                               | (0.78, 2.47)  | 0.264        | 3.18                                                                                                                             | (1.69, 5.98) | <0.001       |
| Age group (years) <sup>a</sup> |                                                                                                                                     |              |              |                                                                                                                                 |               |              |                                                                                                                                             |               |              |                                                                                                                                    |               |              |                                                                                                                                  |              |              |
| 18-24                          | 1.69                                                                                                                                | (0.36, 7.88) | 0.506        | 0.29                                                                                                                            | (0.04, 2.26)  | 0.235        | 16.69                                                                                                                                       | (8.11, 34.33) | <0.001       | 3.43                                                                                                                               | (0.84, 13.98) | 0.085        | 3.10                                                                                                                             | (0.99, 9.73) | 0.052        |
| 25-39                          | 1.89                                                                                                                                | (0.83, 3.83) | 0.077        | 1.55                                                                                                                            | (1.13, 2.11)  | <b>0.006</b> | 4.61                                                                                                                                        | (2.94, 7.22)  | <0.001       | 4.25                                                                                                                               | (1.10, 16.38) | <b>0.035</b> | 2.13                                                                                                                             | (0.88, 5.14) | 0.092        |
| 40-54                          | 0.94                                                                                                                                | (0.46, 1.93) | 0.876        | 1.18                                                                                                                            | (0.88, 1.58)  | 0.261        | 2.38                                                                                                                                        | (1.51, 3.75)  | <0.001       | 3.19                                                                                                                               | (0.80, 12.76) | 0.101        | 1.37                                                                                                                             | (0.57, 3.28) | 0.486        |
| 55+                            | 1.00                                                                                                                                |              |              | 1.00                                                                                                                            |               |              | 1.00                                                                                                                                        |               |              | 1.00                                                                                                                               |               |              | 1.00                                                                                                                             |              |              |
| Education                      |                                                                                                                                     |              |              |                                                                                                                                 |               |              |                                                                                                                                             |               |              |                                                                                                                                    |               |              |                                                                                                                                  |              |              |
| Low                            | 1.00                                                                                                                                |              |              | 1.00                                                                                                                            |               |              | 1.00                                                                                                                                        |               |              | 1.00                                                                                                                               |               |              | 1.00                                                                                                                             |              |              |
| Moderate                       | 1.28                                                                                                                                | (0.54, 3.02) | 0.569        | 3.44                                                                                                                            | (0.87, 13.51) | 0.077        | 0.74                                                                                                                                        | (0.20, 2.71)  | 0.654        | 0.82                                                                                                                               | (0.53, 1.27)  | 0.374        | 1.72                                                                                                                             | (0.87, 3.42) | 0.120        |
| High                           | 2.37                                                                                                                                | (1.12, 4.99) | <b>0.024</b> | 4.04                                                                                                                            | (1.01, 16.10) | <b>0.048</b> | 1.20                                                                                                                                        | (0.33, 4.32)  | 0.784        | 1.27                                                                                                                               | (0.86, 1.86)  | 0.224        | 2.38                                                                                                                             | (1.10, 5.15) | <b>0.028</b> |
| Smoking frequency              |                                                                                                                                     |              |              |                                                                                                                                 |               |              |                                                                                                                                             |               |              |                                                                                                                                    |               |              |                                                                                                                                  |              |              |
| Daily                          | 1.00                                                                                                                                |              |              | 1.00                                                                                                                            |               |              | 1.00                                                                                                                                        |               |              | 1.00                                                                                                                               |               |              | 1.00                                                                                                                             |              |              |
| Non-daily                      | 1.68                                                                                                                                | (0.56, 5.07) | 0.358        | 1.43                                                                                                                            | (0.93, 2.22)  | 0.105        | 1.76                                                                                                                                        | (1.07, 2.91)  | <b>0.026</b> | 0.96                                                                                                                               | (0.58, 1.60)  | 0.890        | 0.91                                                                                                                             | (0.47, 1.77) | 0.782        |
| Plans to quit                  |                                                                                                                                     |              |              |                                                                                                                                 |               |              |                                                                                                                                             |               |              |                                                                                                                                    |               |              |                                                                                                                                  |              |              |
| No plans                       | 1.00                                                                                                                                |              |              | 1.00                                                                                                                            |               |              | 1.00                                                                                                                                        |               |              | 1.00                                                                                                                               |               |              | 1.00                                                                                                                             |              |              |
| Within the next 6 months       | 1.28                                                                                                                                | (0.56, 2.93) | 0.550        | 2.13                                                                                                                            | (1.42, 3.19)  | <0.001       | 1.56                                                                                                                                        | (1.10, 2.22)  | <b>0.013</b> | 1.05                                                                                                                               | (0.59, 1.84)  | 0.874        | 0.93                                                                                                                             | (0.40, 2.19) | 0.868        |
| In future beyond 6 months      | 1.98                                                                                                                                | (0.85, 4.59) | 0.112        | 1.51                                                                                                                            | (1.15, 1.98)  | <b>0.003</b> | 1.50                                                                                                                                        | (1.04, 2.17)  | <b>0.030</b> | 0.74                                                                                                                               | (0.41, 1.32)  | 0.303        | 0.66                                                                                                                             | (0.31, 1.37) | 0.261        |

<sup>a</sup> Age group is 20-24 years for Japan and 19-24 years for Republic of Korea, based on the respective countries’ definitions of the start of adulthood.

† Separate logistic regression models estimated for each country and adjusted for all variables in table.

**Bolded= p<0.05**

Supplementary Table 5. Frequency of crushing capsule among adults who smoke whose usual/current brand of cigarettes has a flavour capsule across four countries of the ITC Surveys, weighted (full table)

| BRAZIL<br><i>Wave 3, 2016/2017</i><br>(N=74)<br> |    |      |               | JAPAN<br><i>Wave 4, 2021</i><br>(N=485)<br> |      |              | REPUBLIC OF KOREA<br><i>Wave 2, 2021</i><br>(N=1216)<br> |      |              | MALAYSIA<br><i>Wave 1, 2020</i><br>(N=332)<br> |      |              |
|-----------------------------------------------------------------------------------------------------------------------------------|----|------|---------------|--------------------------------------------------------------------------------------------------------------------------------|------|--------------|---------------------------------------------------------------------------------------------------------------------------------------------|------|--------------|-----------------------------------------------------------------------------------------------------------------------------------|------|--------------|
| Frequency of crushing capsules <sup>a</sup>                                                                                       | n  | %    | 95%CI         | n                                                                                                                              | %    | 95%CI        | n                                                                                                                                           | %    | 95%CI        | n                                                                                                                                 | %    | 95%CI        |
| Every capsule                                                                                                                     | 38 | 52.7 | (34.4, 70.3)  | 332                                                                                                                            | 76.6 | (67.9, 83.5) | 711                                                                                                                                         | 59.7 | (47.1, 71.1) | 138                                                                                                                               | 45.1 | (37.7, 52.7) |
| Most capsules                                                                                                                     | 5  | 12.1 | (3.3, 35.7) ‡ | 71                                                                                                                             | 13.6 | (8.2, 21.8)  | 266                                                                                                                                         | 24.2 | (13.1, 40.3) | 93                                                                                                                                | 26.1 | (20.2, 33.0) |
| About half of capsules                                                                                                            | 5  | 3.0  | (1.0, 8.9) ‡  | 23                                                                                                                             | 3.1  | (1.8, 5.0)   | 119                                                                                                                                         | 5.0  | (3.1, 8.0)   | 42                                                                                                                                | 10.5 | (7.1, 15.2)  |
| Some capsules, but less than half                                                                                                 | 10 | 14.3 | (5.5, 32.5) ‡ | 29                                                                                                                             | 3.7  | (2.3, 5.8)   | 70                                                                                                                                          | 6.5  | (4.0, 10.4)  | 27                                                                                                                                | 7.1  | (4.2, 11.6)  |
| Never                                                                                                                             | 15 | 17.8 | (8.2, 34.5) ‡ | 22                                                                                                                             | 3.1  | (1.8, 5.1)   | 46                                                                                                                                          | 4.6  | (2.8, 7.6)   | 21                                                                                                                                | 11.2 | (6.9, 17.5)  |

<sup>a</sup> “*When you smoke a pack of your usual/current brand, how often do you crush the flavour capsule?*”; This question was not asked in the Wave 8 ITC Mexico survey.

‡ Indicates high sampling variability; relative standard error > 0.3; interpret with caution

Refused/don’t know responses set to missing: Brazil (n=1), Japan (n=8), Republic of Korea (n=4), Malaysia (n=1)

Supplementary Table 6. Perceptions of usual cigarette brand harmfulness compared to other brands among adults who smoke whose usual/current brand of cigarettes has a flavour capsule compared to no capsules across four countries of the ITC Surveys, weighted (full table)

| BRAZIL<br>            |     |      |                |                     |      |              |                      | JAPAN<br>    |      |               |                     |      |              |                      |
|--------------------------------------------------------------------------------------------------------|-----|------|----------------|---------------------|------|--------------|----------------------|-------------------------------------------------------------------------------------------------|------|---------------|---------------------|------|--------------|----------------------|
| Flavour capsule (N=74)                                                                                 |     |      |                | No capsule (N=1127) |      |              |                      | Flavour capsule (N=485)                                                                         |      |               | No capsule (N=2211) |      |              |                      |
| Harm of usual brand compared to others <sup>a</sup>                                                    | n   | %    | 95%CI          | n                   | %    | 95%CI        | p-value <sup>b</sup> | n                                                                                               | %    | 95%CI         | n                   | %    | 95%CI        | p-value <sup>b</sup> |
| Little less harmful                                                                                    | 15  | 13.7 | (6.3, 27.3) ‡  | 228                 | 19.1 | (16.0, 22.7) | 0.372                | 35                                                                                              | 8.8  | (4.3, 17.1) ‡ | 133                 | 6.9  | (5.1, 9.2)   | 0.533                |
| No different                                                                                           | 44  | 58.0 | (38.6, 75.2)   | 761                 | 70.6 | (66.5, 74.4) | 0.175                | 348                                                                                             | 85.0 | (76.8, 90.6)  | 1446                | 77.2 | (72.8, 81.1) | 0.084                |
| Little more harmful                                                                                    | 12  | 28.3 | (13.1, 50.9) ‡ | 105                 | 10.2 | (7.9, 13.3)  | <b>0.011</b>         | 36                                                                                              | 6.2  | (4.0, 9.6)    | 290                 | 15.9 | (12.4, 20.1) | <b>&lt;0.001</b>     |
| Refused/don't know*                                                                                    | 3   | --   | --             | 33                  | --   | --           | --                   | 66                                                                                              | --   | --            | 342                 | --   | --           | --                   |
| REPUBLIC OF KOREA<br> |     |      |                |                     |      |              |                      | MALAYSIA<br> |      |               |                     |      |              |                      |
| Flavour capsule (N=1216)                                                                               |     |      |                | No capsule (N=2414) |      |              |                      | Flavour capsule (N=332)                                                                         |      |               | No capsule (N=719)  |      |              |                      |
| Harm of usual brand compared to others <sup>a</sup>                                                    | n   | %    | 95%CI          | n                   | %    | 95%CI        | p-value <sup>b</sup> | n                                                                                               | %    | 95%CI         | n                   | %    | 95%CI        | p-value <sup>b</sup> |
| Little less harmful                                                                                    | 72  | 11.5 | (4.4, 26.8) ‡  | 118                 | 8.7  | (4.2, 16.9)  | 0.633                | 58                                                                                              | 18.5 | (13.3, 25.0)  | 86                  | 11.1 | (8.5, 14.4)  | <b>0.016</b>         |
| No different                                                                                           | 820 | 74.2 | (61.4, 83.8)   | 1761                | 78.5 | (71.8, 84.0) | 0.496                | 202                                                                                             | 66.9 | (58.6, 73.6)  | 516                 | 78.6 | (74.5, 82.1) | <b>0.003</b>         |
| Little more harmful                                                                                    | 238 | 14.3 | (8.8, 22.6)    | 360                 | 12.8 | (10.1, 16.1) | 0.681                | 54                                                                                              | 14.6 | (10.1, 20.6)  | 76                  | 10.3 | (7.9, 13.4)  | 0.128                |
| Refused/ don't know*                                                                                   | 86  | --   | --             | 175                 | --   | --           | --                   | 18                                                                                              | --   | --            | 41                  | --   | --           | --                   |

<sup>a</sup>“Do you think that the brand you usually/currently smoke, might be a little less harmful, no different, or a little more harmful, compared to other cigarette brands?”; This question was not asked in the Wave 8 (2021) ITC Mexico study. However, ITC Mexico data from 2018-2020 captured relative harm perceptions in a recent study.(5)

<sup>b</sup> P-values from weighted  $\chi^2$  tests comparing the proportion of each outcome by usual brand flavour capsule vs no capsule; **Bolded**= p<0.05

‡ Indicates high sampling variability; relative standard error > 0.3; interpret with caution

\*Refused/don’t know responses set to missing

Supplementary Table 7. Reasons for usual brand choice among adults who smoke whose usual/current brand of cigarettes has a flavour capsule compared to no capsules in Brazil and Malaysia, ITC Surveys, weighted

|                                             | BRAZIL<br> |      |                |                     |      |              |                      | MALAYSIA<br> |      |              |                    |      |              |                      |
|---------------------------------------------|---------------------------------------------------------------------------------------------|------|----------------|---------------------|------|--------------|----------------------|-------------------------------------------------------------------------------------------------|------|--------------|--------------------|------|--------------|----------------------|
|                                             | Flavour capsule (N=74)                                                                      |      |                | No capsule (N=1127) |      |              |                      | Flavour capsule (N=332)                                                                         |      |              | No capsule (N=719) |      |              |                      |
| Reasons for usual brand choice <sup>a</sup> | n                                                                                           | %    | 95%CI          | n                   | %    | 95%CI        | p-value <sup>b</sup> | n                                                                                               | %    | 95%CI        | n                  | %    | 95%CI        | p-value <sup>b</sup> |
| Taste (Yes)                                 | 65                                                                                          | 89.5 | (74.8, 96.1)   | 644                 | 60.6 | (56.0, 65.1) | <0.001               | 290                                                                                             | 95.9 | (91.6, 98.0) | 593                | 93.0 | (89.9, 95.2) | 0.198                |
| No                                          | 9                                                                                           |      |                | 399                 |      |              |                      | 13                                                                                              |      |              | 40                 |      |              |                      |
| Don't know/refused/not applicable*          | 0                                                                                           |      |                | 10                  |      |              |                      | 29                                                                                              |      |              | 86                 |      |              |                      |
| Price (Yes)                                 | 17                                                                                          | 27.6 | (14.7, 45.7)   | 380                 | 37.1 | (32.9, 41.6) | 0.288                | 225                                                                                             | 79.1 | (72.7, 84.3) | 442                | 73.9 | (69.5, 77.8) | 0.167                |
| No                                          | 57                                                                                          |      |                | 670                 |      |              |                      | 77                                                                                              |      |              | 191                |      |              |                      |
| Don't know/refused/not applicable*          | 0                                                                                           |      |                | 3                   |      |              |                      | 30                                                                                              |      |              | 86                 |      |              |                      |
| Tar, nicotine levels (Yes)                  | 22                                                                                          | 33.4 | (18.8, 52.1)   | 348                 | 33.9 | (29.7, 38.3) | 0.960                | --                                                                                              | --   | --           | --                 | --   | --           | --                   |
| No                                          | 52                                                                                          |      |                | 663                 |      |              |                      |                                                                                                 |      |              |                    |      |              |                      |
| Don't know/refused/not applicable *         | 0                                                                                           |      |                | 42                  |      |              |                      |                                                                                                 |      |              |                    |      |              |                      |
| Not as bad for health (Yes)                 | 22                                                                                          | 23.7 | (12.8, 39.5)   | 397                 | 37.8 | (33.5, 42.4) | 0.080                | 148                                                                                             | 50.3 | (42.5, 58.0) | 184                | 25.7 | (22.5, 31.5) | <0.001               |
| No                                          | 52                                                                                          |      |                | 628                 |      |              |                      | 138                                                                                             |      |              | 401                |      |              |                      |
| Don't know/refused/not applicable *         | 0                                                                                           |      |                | 28                  |      |              |                      | 46                                                                                              |      |              | 134                |      |              |                      |
| Pack colour (Yes)                           | 14                                                                                          | 21.5 | (10.4, 39.6) ‡ | 116                 | 10.8 | (8.0, 14.4)  | 0.077                | --                                                                                              | --   | --           | --                 | --   | --           | --                   |
| No                                          | 59                                                                                          |      |                | 930                 |      |              |                      |                                                                                                 |      |              |                    |      |              |                      |
| Don't know/refused/not applicable *         | 1                                                                                           |      |                | 7                   |      |              |                      |                                                                                                 |      |              |                    |      |              |                      |
| Pack design (Yes)                           | --                                                                                          | --   | --             | --                  | --   | --           | --                   | 152                                                                                             | 46.1 | (38.6, 53.8) | 148                | 20.8 | (17.2, 24.9) | <0.001               |
| No                                          |                                                                                             |      |                |                     |      |              |                      | 147                                                                                             |      |              | 478                |      |              |                      |
| Don't know/refused/not applicable*          |                                                                                             |      |                |                     |      |              |                      | 33                                                                                              |      |              | 93                 |      |              |                      |
| Friends use (Yes)                           | --                                                                                          | --   | --             | --                  | --   | --           | --                   | 170                                                                                             | 52.0 | (44.3, 59.7) | 245                | 35.3 | (30.8, 40.0) | <0.001               |
| No                                          |                                                                                             |      |                |                     |      |              |                      | 126                                                                                             |      |              | 374                |      |              |                      |
| Don't know/refused/not applicable *         |                                                                                             |      |                |                     |      |              |                      | 36                                                                                              |      |              | 100                |      |              |                      |

<sup>a</sup> “In choosing your usual brand, was part of your decision to smoke this brand based on any of the following...”

<sup>b</sup> P-values from weighted  $\chi^2$  tests comparing the proportion of each outcome by usual brand flavour capsule vs no capsule; **Bolded**= p<0.05

‡ Indicates high sampling variability; relative standard error > 0.3; interpret with caution

\*Refused/don’t know responses set to missing
